# Supplementary material for: Safety Run-in of Intramuscular pNGVL4a-Sig/E7(detox)/HSP70 DNA and TA-CIN Protein Vaccination as Treatment for HPV16+ ASC-US, ASC-H, or LSIL/CIN1
Source: Oxford University Press journal article supplement (doi:10.1158/1940-6207.capr-22-0413), 2023-01-05
Supplement: capr-22-0413_supplementary_table_s1_suppst1.docx [file capr-22-0413_supplementary_table_s1_suppst1.docx]

Supplementary Table S1. **Diastolic blood pressure of study participants at indicated timepoints during the study, including immediately pre- and 30 minutes post-vaccination**. SD=standard deviation. Q1, Q3= first and third quartile. Min, Max=minimum and maximum values recorded.

| **Time point** | **Pre-/Post**  **Vaccination** | **n=persons** | **Diastolic Blood Pressure (mmHg)** | | |
| --- | --- | --- | --- | --- | --- |
| **Mean (SD)** | **Median (Q1, Q3)** | **Min, Max** |
| Baseline | Pre | 12 | 81.3 (6.98) | 82.5 (76.0, 86.0) | 68, 91 |
| Week 0 | Post | 12 | 81.8 (4.90) | 81.0 (79.0, 85.0) | 75, 91 |
| Week 4 | Pre | 12 | 81.7 (7.41) | 82.0 (76.5, 86.0) | 70, 94 |
| Week 4 | Post | 12 | 79.8 (4.91) | 79.0 (76.0, 85.5) | 73, 86 |
| Week 8 | Pre | 12 | 85.8 (7.35) | 85.5 (81.5, 92.0) | 72, 95 |
| Week 8 | Post | 12 | 84.9 (7.91) | 87.5 (78.0, 91.5) | 72, 95 |
| Week 12 | N/A | 12 | 83.8 (7.54) | 86.0 (78.5, 89.0) | 69, 94 |
| Month 6 | N/A | 11 | 84.6 (9.44) | 84.0 (78.0, 93.0) | 70, 100 |
| Month 12 | N/A | 11 | 82.5 (8.02) | 83.0 (78.0, 90.0) | 65, 93 |
